# Supplementary material for: Hemizygous Deletion on Chromosome 3p26.1 Is Associated with Heavy Smoking among African American Subjects in the COPDGene Study
Source: PubMed Central journal article supplement (PMC5053531; doi:10.1371/journal.pone.0164134), 2016-10-06
Supplement: pone.0164134.s002.pdf [file pone.0164134.s002.pdf]

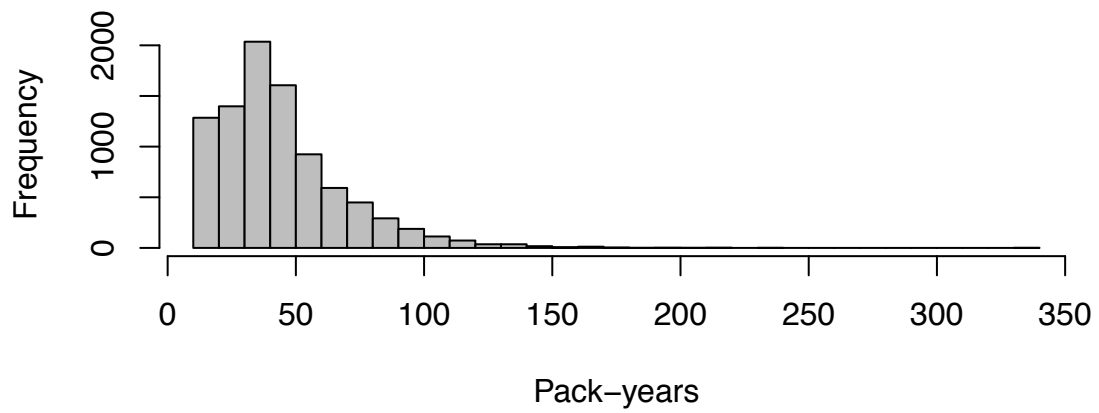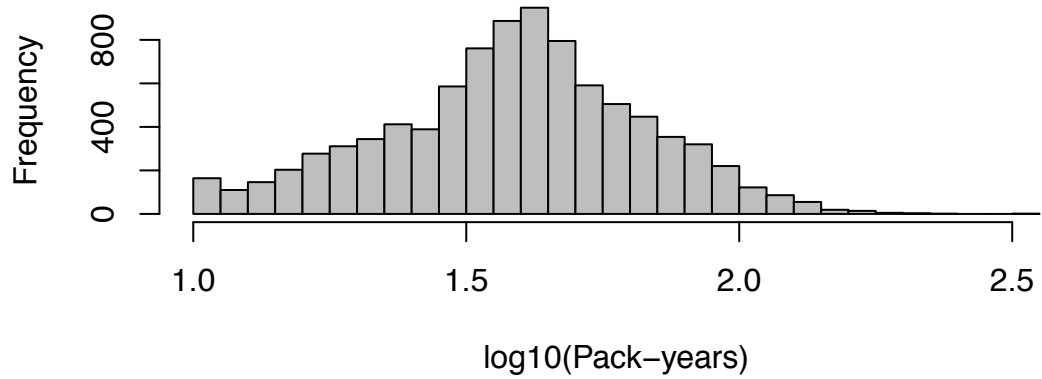

**S2 Fig: Distribution of pack-years and log-transformed pack-years among COPDGene AA subjects**
