# Supplementary material for: Hemizygous Deletion on Chromosome 3p26.1 Is Associated with Heavy Smoking among African American Subjects in the COPDGene Study
Source: PubMed Central journal article supplement (PMC5053531; doi:10.1371/journal.pone.0164134), 2016-10-06
Supplement: pone.0164134.s003.pdf [file pone.0164134.s003.pdf]

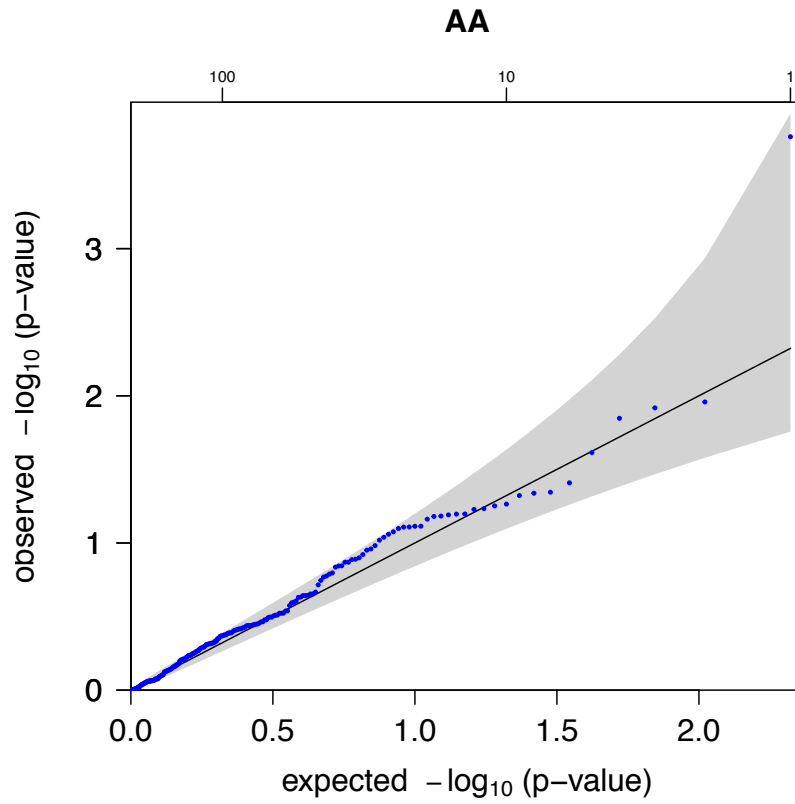

**S3 Fig: Quantile-Quantile (Q-Q) plot ( $\lambda=1.02$ ) of the genome-wide CNP association study with pack-years of smoking among AA subjects.  $-\log_{10}$  transformed observed p-values (Y-axis) were plotted against  $-\log_{10}$  transformed expected p-values (X-axis).**
