# Supplementary material for: Hemizygous Deletion on Chromosome 3p26.1 Is Associated with Heavy Smoking among African American Subjects in the COPDGene Study
Source: PubMed Central journal article supplement (PMC5053531; doi:10.1371/journal.pone.0164134), 2016-10-06
Supplement: pone.0164134.s004.pdf [file pone.0164134.s004.pdf]

**Distribution of permuted minimum p-values**

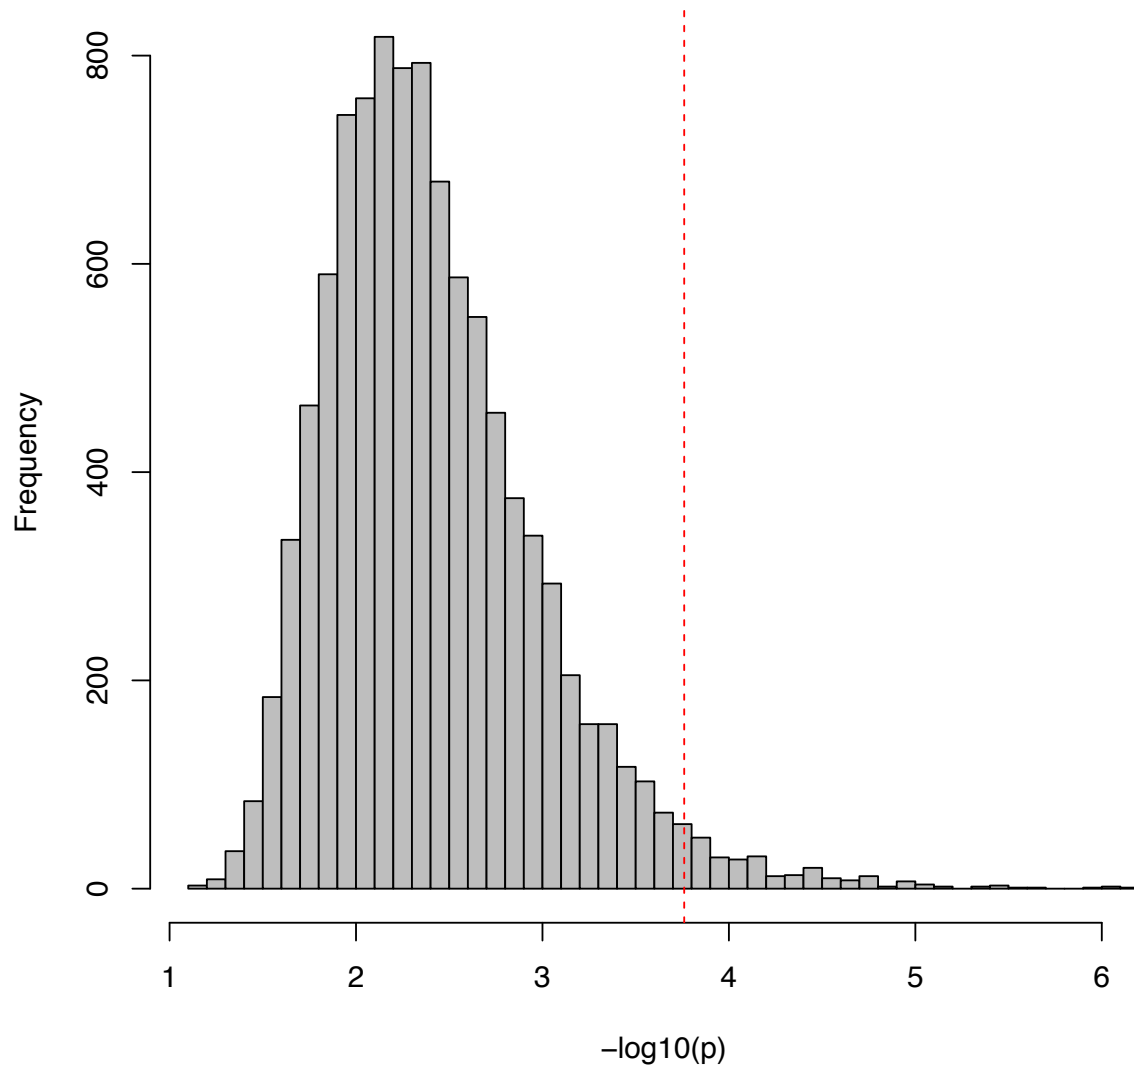

**S4 Fig: Histogram of 10,000 permuted p-values and the observed p-values (denoted by the red dotted line).**
