# Supplementary material for: Hemizygous Deletion on Chromosome 3p26.1 Is Associated with Heavy Smoking among African American Subjects in the COPDGene Study
Source: PubMed Central journal article supplement (PMC5053531; doi:10.1371/journal.pone.0164134), 2016-10-06
Supplement: pone.0164134.s005.pdf [file pone.0164134.s005.pdf]

**a. BAF plot for deletions (77)**

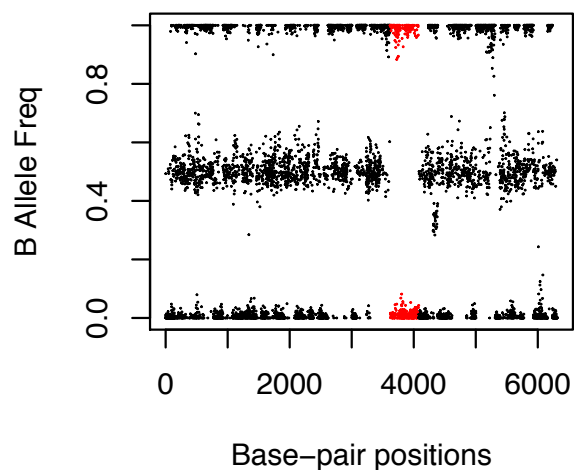

**b. LRR plot for deletions (77)**

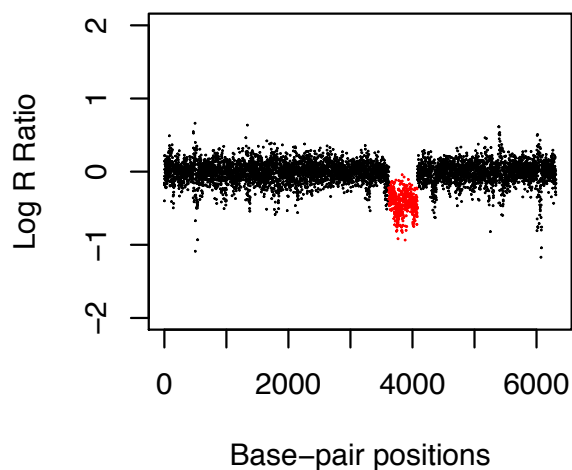

**a. BAF plot for normal diploids (77)**

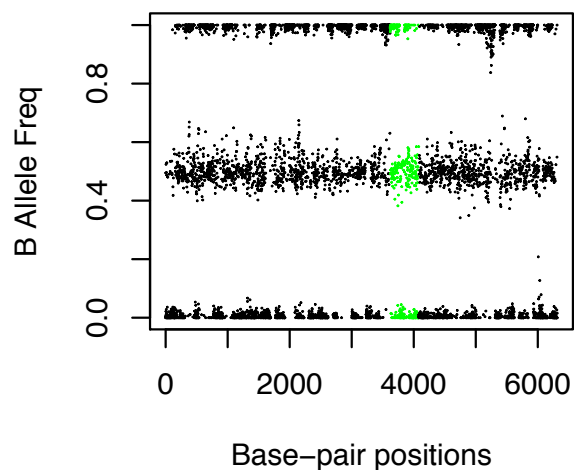

**b. LRR plot for normal diploids (77)**

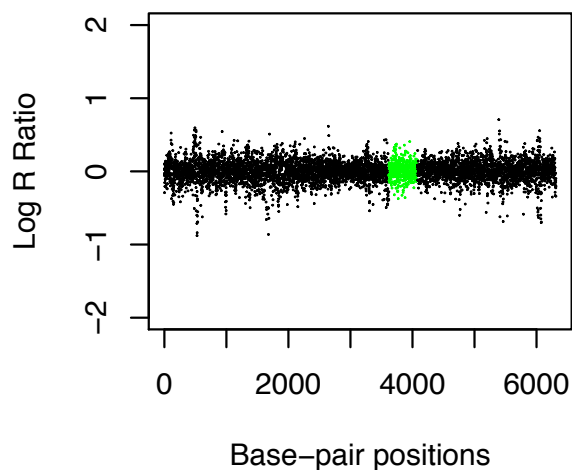

**S5 Fig: B allele frequency (BAF) and Log R Ratio (LRR) plot of deleted and normal subjects. Top panel: a. BAF plot of observed markers from 77 subjects with hemizygous deletions b. LRR intensities for these same 77 subjects with hemizygous deletions Bottom panel: a. BAF plot of 77 individuals called as normal diploids in this same region b. LRR plot of 77 diploid subjects.**
