# Supplementary material for: Hemizygous Deletion on Chromosome 3p26.1 Is Associated with Heavy Smoking among African American Subjects in the COPDGene Study
Source: PubMed Central journal article supplement (PMC5053531; doi:10.1371/journal.pone.0164134), 2016-10-06
Supplement: pone.0164134.s006.pdf [file pone.0164134.s006.pdf]

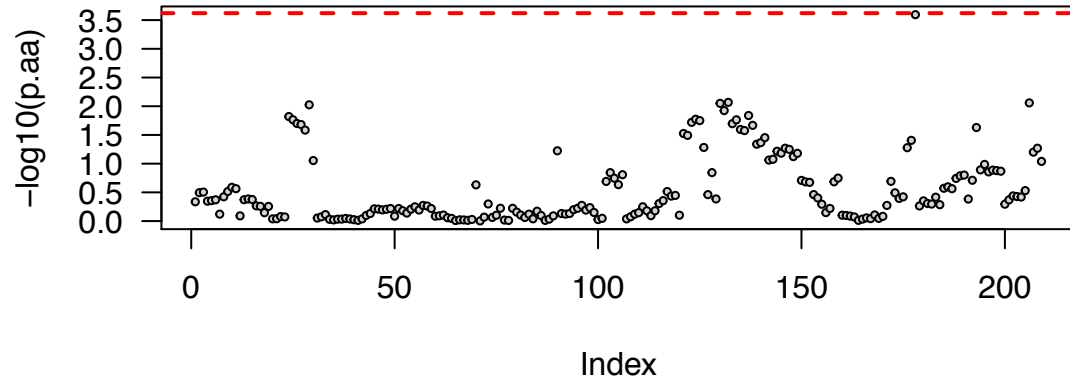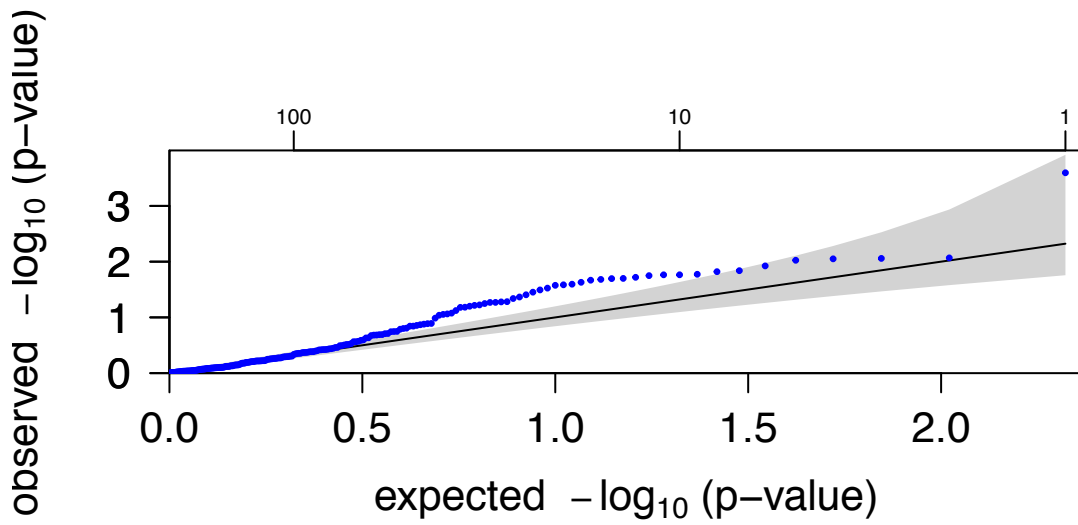

**S6 Fig: Association plot and QQ plot ( $\lambda=1.05$ ) or association of copy number variants and average cigarettes smoked per day for COPDGene AA subjects.**
