# Supplementary material for: Hemizygous Deletion on Chromosome 3p26.1 Is Associated with Heavy Smoking among African American Subjects in the COPDGene Study
Source: PubMed Central journal article supplement (PMC5053531; doi:10.1371/journal.pone.0164134), 2016-10-06
Supplement: pone.0164134.s007.pdf [file pone.0164134.s007.pdf]

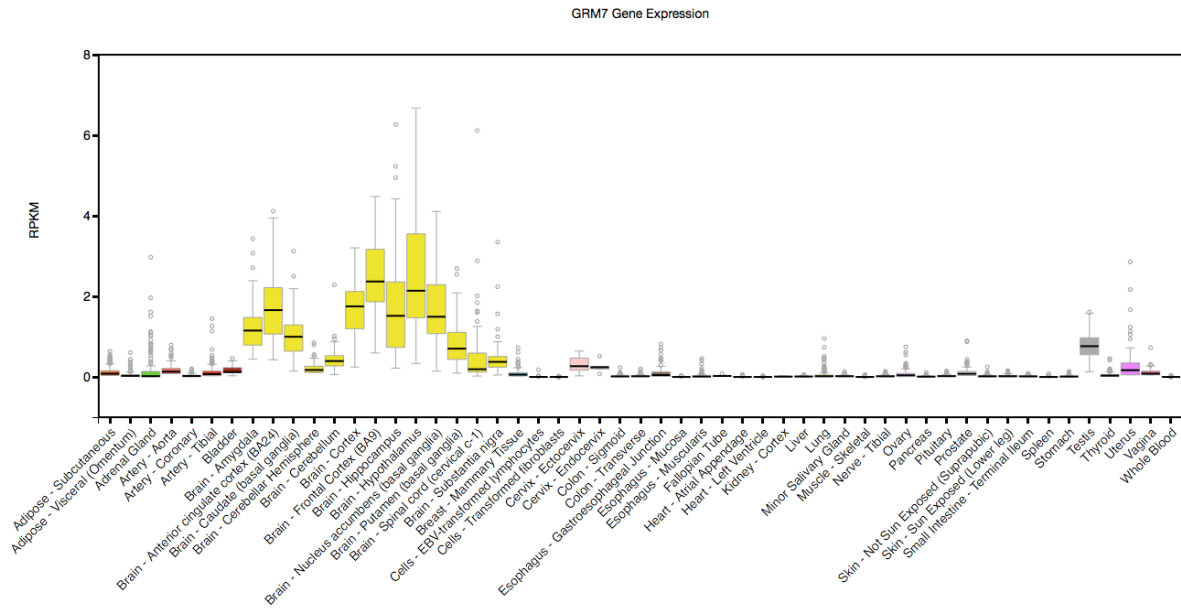

**S7 Fig: Gene expression for *GRM7*. Data Source: GTEx Analysis Release V6 (dbGaP Accession phs000424.v6.p1) (<http://www.gtexportal.org/home/gene/GRM7>)**
