# Supplementary material for: Hemizygous Deletion on Chromosome 3p26.1 Is Associated with Heavy Smoking among African American Subjects in the COPDGene Study
Source: PubMed Central journal article supplement (PMC5053531; doi:10.1371/journal.pone.0164134), 2016-10-06
Supplement: pone.0164134.s009.pdf [file pone.0164134.s009.pdf]

**S1 Table: List of the ethics committee/institutional review board(s)**

| <b>Clinical Center</b>                                    | <b>Institution Title</b>                                                                                                   | <b>Protocol Number</b>  |
|-----------------------------------------------------------|----------------------------------------------------------------------------------------------------------------------------|-------------------------|
| National Jewish Health                                    | National Jewish IRB                                                                                                        | HS-1883a                |
| Brigham and Women's Hospital                              | Partners Human Research Committee                                                                                          | 2007-P-000554/2;<br>BWH |
| Baylor College of Medicine                                | Institutional Review Board for Baylor College of Medicine and Affiliated Hospitals                                         | H-22209                 |
| Michael E. DeBakey VAMC                                   | Institutional Review Board for Baylor College of Medicine and Affiliated Hospitals                                         | H-22202                 |
| Columbia University Medical Center                        | Columbia University Medical Center IRB                                                                                     | IRB-AAAC9324            |
| Duke University Medical Center                            | The Duke University Health System Institutional Review Board for Clinical Investigations (DUHS IRB)                        | Pro00004464             |
| Johns Hopkins University                                  | Johns Hopkins Medicine Institutional Review Boards (JHM IRB)                                                               | NA_00011524             |
| Los Angeles Biomedical Research Institute                 | The John F. Wolf, MD Human Subjects Committee of Harbor-UCLA Medical Center                                                | 12756-01                |
| Morehouse School of Medicine                              | Morehouse School of Medicine Institutional Review Board                                                                    | 07-1029                 |
| Temple University                                         | Temple University Office for Human Subjects Protections Institutional Review Board                                         | 11369                   |
| University of Alabama at Birmingham                       | The University of Alabama at Birmingham Institutional Review Board for Human Use                                           | FO70712014              |
| University of California, San Diego                       | University of California, San Diego Human Research Protections Program                                                     | 070876                  |
| University of Iowa                                        | The University of Iowa Human Subjects Office                                                                               | 200710717               |
| Ann Arbor VA                                              | VA Ann Arbor Healthcare System IRB                                                                                         | PCC 2008-110732         |
| University of Minnesota                                   | University of Minnesota Research Subjects' Protection Programs (RSPP)                                                      | 0801M24949              |
| University of Pittsburgh                                  | University of Pittsburgh Institutional Review Board                                                                        | PRO07120059             |
| University of Texas Health Sciences Center at San Antonio | UT Health Science Center San Antonio Institutional Review Board                                                            | HSC20070644H            |
| Health Partners Research Foundation                       | Health Partners Research Foundation Institutional Review Board                                                             | 07-127                  |
| University of Michigan                                    | Medical School Institutional Review Board (IRBMED)                                                                         | HUM00014973             |
| Minneapolis VA Medical Center                             | Minneapolis VAMC IRB                                                                                                       | 4128-A                  |
| Fallon Clinic                                             | Institutional Review Board/Research Review Committee Saint Vincent Hospital – Fallon Clinic – Fallon Community Health Plan | 1143                    |
