# Supplementary material for: Hemizygous Deletion on Chromosome 3p26.1 Is Associated with Heavy Smoking among African American Subjects in the COPDGene Study
Source: PubMed Central journal article supplement (PMC5053531; doi:10.1371/journal.pone.0164134), 2016-10-06
Supplement: pone.0164134.s010.pdf [file pone.0164134.s010.pdf]

**S2 Table: Estimated regression coefficients from linear regression models testing for association between pack-years/cigarettes per day and polymorphic deletion CNVs on chr 3p26 in COPDGene & ARIC African Americans**

|                      | Phenotype      | Estimated $\beta$ | Std.Errors | p-value    |
|----------------------|----------------|-------------------|------------|------------|
| COPDGene AA subjects | Pack-years     | 0.097169          | 0.025847   | 0.0002 *** |
|                      | Cigarettes/day | 0.425393          | 0.116155   | 0.0003 *** |
| ARIC AA subjects     | Pack-years     | 0.054717          | 0.034674   | 0.1149     |
|                      | Cigarettes/day | 0.177984          | 0.145275   | 0.2208     |

Regression model for COPDGene included gender, age and global admixture scores as covariates; regression model for ARIC study included gender, age and first 6 principal components as covariates.
